# Supplementary material
Source: PubMed Central journal article supplement (PMC3079326)
Supplement: NIHMS262941-supplement-supplement_1.pdf [file NIHMS262941-supplement-supplement_1.pdf]

## 1 SUPPLEMENTARY INFORMATION

### 2 EXPERIMENTAL PROCEDURES

3 **Cell Culture:** 4pX-1 cells were grown in DMEM/F12, pH 7.2 containing 2 mM L-glutamine,  
4 0.24% sodium bicarbonate, 50 µg/ml gentamycin, 10% FBS, Insulin-Transferrin-Selenium (ITS),  
5 G418, and hygromycin were supplemented as described (40). Tetracycline (5 µg/ml) was added  
6 to block pX expression. HepG2, Hep3B and Huh7 were grown in DMEM supplemented with  
7 10% FBS. SNU423 cells were maintained in RPMI 1640 supplemented with 10% FBS.  
8 HepAD38 were maintained in DMEM/F12 supplemented with 10% FBS, 100 µg/ml kanamycin,  
9 300 ng/ml tetracycline and 400 µg/ml G418. The following reagents were used: nocodazole (300  
10 ng/ml), Sigma; Doxorubicin (0.25-0.5 µg/ml) Calbiochem; BI 2536 (0.5 µM) AxonMedChem.  
11 Hep3B, Huh7, and SNU423 cell lines were purchased from ATCC. HepG2 and HepAD38 cells  
12 (40) were kindly provided by Drs. M. Bouchard and C. Seeger, respectively.

13  
14 **Flow Cytometry:** cells were harvested following trypsin treatment, counted and centrifuged for  
15 one minute at 2000 rpm. 1ml PBS (phosphate-buffered-saline) was added to the pellet followed  
16 by centrifugation for one minute at 2000 rpm and removal of the supernatant. Cells were stored  
17 at -80°C until analyzed. For analysis, cells were incubated at 4°C for two hours in the presence  
18 of 50% Vindelov's reagent containing PBS, 3.5 units/ml RNase A, 75 mg/ml propidium iodide,  
19 0.1% NP-40 and 50% IF buffer (130 mM NaCl, 3.5 mM NaH<sub>2</sub>PO<sub>4</sub>, 7.7 mM NaN<sub>3</sub>).  
20 Unsynchronized 4pX-1 cells were used as control. Chick erythrocytes were added as an internal  
21 control and analyzed on Cytomics FC-500 (Beckman-Coulter) flow cytometer.

22

1 **Live Cell Sorting:** 4pX-1 cells were synchronized by serum starvation in DMEM/F12  
2 containing 10 $\mu$ M EGFRi for 18 h (39). Serum starved cells were fed 10% FBS to re-enter the  
3 cell cycle. Tetracycline was removed at 10 h after addition of 10% FBS; nocodazole (250 ng/ml)  
4 was added for 6 h prior to cell harvesting. Cells were harvested by trypsin treatment,  
5 resuspended in Dulbecco's modified Eagle's medium/F-12 medium containing 20% FBS, and  
6 stained with Hoechst 33422 (500 ng/ml) 1 h before cell sorting. Cells were sorted for DNA  
7 content employing the Epics Altra cell sorter (Beckman-Coulter). Unsynchronized 4pX-1 cells  
8 were employed as control. Immediately after sorting, 100,000 cells containing >4N DNA content  
9 were plated in soft agar.

10

11 **Soft Agar Assays:** Tissue culture dishes (6 cm) coated with 1% tissue grade agarose (Bio-Rad)  
12 were seeded with 100,000 cells and growth was monitored for 15 days. 300 $\mu$ l of fresh medium  
13 was added every three days. Colonies were imaged using Nikon TE300 at 10X magnification.  
14 Colonies were quantified by Image J software.

15

16 **Real-Time PCR:** cDNA synthesis was performed with 2  $\mu$ g total RNA using iSCRIPT cDNA  
17 synthesis kit (Bio-Rad). Real-Time PCR reactions were performed using the protocol provided  
18 by manufacturer (Applied Biosystems). Reactions were normalized to GAPDH. PCR reactions  
19 were carried out in triplicate using ABI PRISM 7700 System (Perkin-Elmer).

20 **SUZ12 primers**

21 Fwd: 5'-AAAACCTCTGAGAACTTGCCCC-3'

22 Rev: 5'-ACACTGCCTGTTCCCAATCC-3'

23 **ZNF198 primers**

1 Fwd: 5'-GAAGGGAGCCACTAAAGAAC-3'

2 Rev: 5'-GAGTGCCTTGGGATTTACAG-3'

3 **Immunofluorescence Microscopy for PML:** Cells were fixed in 4% paraformaldehyde (Sigma)  
4 or 75% ethanol for 20 min, washed three times in PBS, and incubated for 1 h in blocking buffer  
5 containing 130 mM NaCl, 7 mM Na<sub>2</sub>HPO<sub>4</sub>, 3.5 mM NaH<sub>2</sub>PO<sub>4</sub>, 7.7 mM NaN<sub>3</sub>, 0.1% bovine  
6 serum albumin, 1.0% Triton-X-100, 0.05% Tween 20, and 10% goat serum. Incubation with  
7 primary antibody was carried out at 4°C at the following dilutions: 1:200 for PML (Santa Cruz).  
8 Incubation with secondary antibodies AlexaFluor488 (green) and AlexaFluor568 (red), both  
9 from Invitrogen, was for 1 h at room temperature. Cells were visualized by Nikon TE300 at 20X  
10 and 60X magnification.

11

12 **Preparation of Whole Cell Extract (WCE) and Immunoblotting:** Cells were harvested in  
13 RIPA buffer containing 50 mM Tris pH7.4, 150 mM NaCl, 1% NP-40, 1 mM EDTA, 100 mM  
14 NaF, 50 mM glycerol phosphate, 1 mM sodium orthovanate, 1 mM PMSF, 1 µg/ml aprotinin, 1  
15 µg /ml leupeptin, 1 µg/ml pepstatin, and sonicated on ice for 10 seconds. Lysates were clarified  
16 by centrifugation at 12,000 rpm for 15 minutes at 4°C. Protein concentration was determined by  
17 the Bio-Rad protein assay. 20 µg WCE were boiled in 2X SDS-PAGE loading buffer (4% SDS,  
18 20% glycerol, 2% β-mercaptoethanol, 160 mM Tris pH 6.8), electrophoresed on SDS-PAGE and  
19 transferred to nitrocellulose membrane. Primary antibodies: Plk1 1:1000 (abcam), SUZ12 1:1000  
20 (abcam), ZNF198, 1:500 (Bethyl), PML 1:500 (Santa Cruz) p53 1:1000 (Vector Laboratories),  
21 Cleaved Caspase 3 1:1000 (Cell Signaling), γ-H2AX 1:2000 (Calbiochem)

22

1 **HBV Replication Assay:** HepAD38 cells were grown in 6 cm tissue culture dishes, for indicated  
2 time course (0-20days) with or without tetracycline (5µg/ml). Cells were harvested in 0.2 ml of  
3 tissue lysis buffer (50 mM Tris, 0.5% NP-40, 1 mM EDTA, 100 mM NaCl) and incubated at 4°C.  
4 Cell debris was pelleted and supernatant transferred to a new tube containing 2.0 µl of 1M MgCl<sub>2</sub>  
5 and 2.0 µl DNase 1. Mixture was incubated at 37°C for 2 h. DNase removal reagent (20 µl,  
6 Ambion) was used at room temperature, and pelleted after 2 min. incubation. The supernatant  
7 was used for isolation of HBV DNA from intracellular viral particles employing QIAamp  
8 MinElute Virus Spin Kit (Qiagen) according to manufacturer's protocol. Eluted DNA, 1.0 µl was  
9 used as template in real- time PCR reactions with HBV primers described by (43). Plasmid DNA  
10 carrying the HBV genome (ayw1.2) was serially diluted and used as quantification control,  
11 employing the same primers.

12 **HBV primers:**

13 Fwd: 5'-AGAAACAACACATAGCGCCTCAT-3'

14 Rev: 3'-TGCCCCATGCTGTAGATCTTG-3'

15 HBV Genome Equivalents were calculated using the following equation:

16 NUMBER OF DNA COPIES = (Amount of DNA in nanograms x  $6.022 \times 10^{23}$ )  
17 (Length x  $10^9$  x 650)

18 The calculation makes the assumption that the average mass of a base pair is 650 Daltons.

19  $6.022 \times 10^{23}$  is Avogadro's number. The amount of DNA in nanograms is determined from the  
20 standard curve generated by serial dilution of the control HBV plasmid.

21

22 **siRNA Transfection of HepAD38 cells:** HepAD38 cells grown in the absence of antibiotics for  
23 24 h were transfected using Lipofectamine 2000 (Invitrogen) according to manufacturer's  
24 protocol. The combination of three siRNAs for ZNF198, SUZ12 and PML was used at final

1 concentration of 33nM. Antibiotics including tetracycline were added for an additional 24 h, at 4  
2 h after transfection. HBV replication was assayed as described earlier, using intracellular virions  
3 isolated from HepAD38 cells at 1, 5 and 10 days after tetracycline removal.

4 siRNA sequences:

5 **PML siRNAs**

6 Fwd: 5' GCCUGUCGGUGUACCGGCAGAUUGU 3'

7 Rev: 5' ACAAUCUGCCGGUACACCGACAGGC 3'

8

9 Fwd: 5' CAGGAGGUGCUGGACAUGCACGGUU 3'

10 Rev: 5' AACCGUGCAUGUCCAGCACCUCUG 3'

11

12 Fwd: 5' UCGACGAGUUCAAGGUGCGCCUGCA 3'

13 Rev: 5' UGCAGGCGCACCUUGAACUCGGCGA 3'

14

15 **SUZ12 siRNAs**

16 Fwd: 5' GCCGCAAACUUUAUAGUUUACUCAA 3'

17 Rev: 5' UUGAGUAAACUAUAAAGUUUGCGGC 3'

18

19 Fwd: 5' CCUAUGCAGGAAAUCCUCAGGAUUAU 3'

20 Rev: 5' AUAUCCUGAGGAUUUCCUGCAUAGG 3'

21

22 Fwd: 5' CCAUGUCAUGAAGCAUGGGUUUAUU 3'

23 Rev: 5' AAUAAACCCAUGCUUCAUGACAUGG 3'

1 **ZNF198 siRNAs**

2 Fwd: 5' UCGCCAGUUUGUAGCGCCAAGUGAU 3'

3 Rev: 5' AUCACUUGGCGCUACAAACUGGCCA 3'

4

5 Fwd: 5' GCAACUAUUGUUCUCAGCUAUGUAA 3'

6 Rev: 5' UAACAUAGCUAGAACAAUAGUUGC 3'

7

8 Fwd: 5' UUUAGUUGCUCUCCUUCUACAUAGC 3'

9 Rev: 5' GCUAUGUAAGAAGGGAGCAACUAAA 3'

10

11 **FIGURE LEGENDS**

12 **Supplementary fig. 1.** Identification of genes whose protein depletion rescued pX-expressing  
13 4pX-1 cells from DNA damage-induced apoptosis. The tetracycline-regulated pX-expressing  
14 4pX-1 cell line (39), an immortalized, less-differentiated hepatocyte cell line (14) was used for  
15 this study. We generated a stable population of 4pX-1 cells infected with a lentiviral shRNA  
16 library. Infected 4pX-1 cells were grown for 10 days in apoptotic conditions induced by pX +  
17 doxorubicin. Cells surviving apoptosis for 10 days were propagated separately, generating  
18 individual cell clones. The shRNA insert of surviving clones was sequenced and the depleted  
19 gene identified. The most frequent genes detected by this screen were ZNF198 and SUZ12.

20 \*Topors (43) was identified by a similar screen, involving 10-day selection of infected 4pX-1  
21 cultures with pX + doxorubicin, but without propagation of surviving cells.

22

23 **Supplementary fig. 2.** ZNF198 and SUZ12 associate with PML NBs in pX-expressing cells. **A.**

1 Lysates from 4pX-1 cells grown  $\pm$  pX and  $\pm$  doxorubicin treatment, as indicated, were  
2 immunoprecipitated with PML antibody. IgG immunoprecipitations with lysates from 4pX-1  
3 cells expressing pX. PML and IgG immunoprecipitates were immunoblotted for the indicated  
4 proteins. **B.** Confocal microscopy of 4pX-1 cells with indicated antibodies.

5  
6 **Supplementary fig. 3:** . Knockdown of ZNF198 and SUZ12 increases cell survival in conditions  
7 of pX-mediated apoptosis.. Lysates from indicated cell lines grown without (-) pX and in the  
8 presence of doxorubicin (0.5  $\mu$ g/ml) for 6 h . Actin is loading control.

9  
10 **Supplementary fig. 4.** Knockdown of ZNF198 and SUZ12 increases cell survival in conditions  
11 of pX-mediated apoptosis. **A.** Immunoblots of ZNF198, SUZ12, Topors and PML using lysates  
12 from clonal isolate-2 of indicated knockdown cell lines. 4pX-1 cells with stable integration of  
13 pGIPZ empty vector were constructed in parallel. **B.** Immunoblots of p53 using lysates from  
14 indicated clonal isolate-2. Cells were grown  $\pm$  pX and doxorubicin (0.5  $\mu$ g/ml) for 6 h.

15  
16 **Supplementary fig. 5:** Defective DNA repair in ZNF198 and SUZ12 knockdown cells  
17 **A.** Comet assay of cells grown  $\pm$  pX for 24 h. Cells stained with SYBR Green were analyzed by  
18 agarose gel electrophoresis (13). **B.** Quantification of cells with DNA tailing. (250 cells counted,  
19 from three independent assays). **C.** Quantification of length of DNA tails using Comet Assay IV  
20 software, Perspective Instruments. **D.** Immunoblots of  $\gamma$ -H2AX using lysates from indicated cell  
21 lines grown  $\pm$  pX for 24 h.

22  
23 **Supplementary fig. 6.** Immunoblots of ZNF198, SUZ12 and p53 using WCE isolated from the

1 indicated cell lines after time course treatment (0-12 h) with 0.5  $\mu\text{g/ml}$  doxorubicin. Actin is the  
2 loading control. The status of endogenous p53 is indicated in parenthesis.

3

4 **Supplementary fig. 7.** Immunofluorescence microscopy of endogenous PML or transfected  
5 PML-RFP protein in 4pX-1, 4pX-1-SUZ12<sup>kd</sup>, 4pX-1-ZNF198<sup>kd</sup>, and 4pX-1-PML<sup>kd</sup> at 60X  
6 magnification. Quantification of PML NBs is from approximately 100 cells.

7

8

9
